# Supplementary material
Source: publisher figshare collection journal article supplement (https://acs.figshare.com/ndownloader/files/8941828)
Supplement: Supplementary file 1 [file 8941828]

## Supporting Material

### Dual Action of Hydrotropes at the Water/Oil Interface

Andrei A. Novikov<sup>1</sup>, Anton P. Semenov<sup>1</sup>, Viviana Monje-Galvan<sup>2</sup>, Vladimir N. Kuryakov<sup>3</sup>, Jeffery B. Klauda<sup>2</sup>, and Mikhail A. Anisimov<sup>2,3,\*</sup>

<sup>1</sup> Gubkin University, Moscow, 119991, Russia

<sup>2</sup> Department of Chemical and Biomolecular Engineering, University of Maryland, College Park, MD 20742, USA

<sup>3</sup> Oil and Gas Research Institute of the Russian Academy of Sciences, Moscow, 117333, Russia

\* Corresponding author. Email: Anisimov@umd.edu

## Section 1. Experimental and simulation details

**Table S1 – Initial composition of the samples and composition of equilibrated phases at 20 °C**

| Sam<br>ple | Initial composition, wt% |        |                  | Oil phase at equilibrium, wt% |        |                  | Water phase at equilibrium,<br>wt% |         |                  | Initial composition, mol% |         |                  | Oil phase at equilibrium,<br>mol% |        |                  | Water phase at equilibrium,<br>mol% |         |                  |
|------------|--------------------------|--------|------------------|-------------------------------|--------|------------------|------------------------------------|---------|------------------|---------------------------|---------|------------------|-----------------------------------|--------|------------------|-------------------------------------|---------|------------------|
|            | TBA                      | CHX    | H <sub>2</sub> O | TBA                           | CHX    | H <sub>2</sub> O | TBA                                | CHX     | H <sub>2</sub> O | TBA                       | CHX     | H <sub>2</sub> O | TBA                               | CHX    | H <sub>2</sub> O | TBA                                 | CHX     | H <sub>2</sub> O |
| E0         | 0                        | 49.98  | 50.02            | 0                             | 99.99* | rest             | 0                                  | 0.006** | rest             | 0.0                       | 17.62   | 82.38            | 0.00                              | 99.95* | rest             | 0.00                                | 0.00**  | rest             |
| E1         | 0.001                    | 50.001 | 49.998           | 0.000                         | 99.99* | rest             | 0.002                              | 0.006** | rest             | 0.0004                    | 17.6323 | 82.3673          | 0.000                             | 99.95* | rest             | 0.0005                              | 0.001** | rest             |
| E2         | 0.01                     | 50.00  | 49.99            | 0.001                         | 99.99* | rest             | 0.016                              | 0.005** | rest             | 0.004                     | 17.634  | 82.362           | 0.001                             | 99.96* | rest             | 0.004                               | 0.001** | rest             |
| E3         | 0.05                     | 49.98  | 49.97            | 0.006                         | 99.98* | rest             | 0.085                              | 0.005** | rest             | 0.02                      | 17.63   | 82.35            | 0.007                             | 99.93* | rest             | 0.021                               | 0.001** | rest             |
| E4         | 0.10                     | 49.94  | 49.95            | 0.01                          | 99.97* | rest             | 0.18                               | 0.006** | rest             | 0.04                      | 17.62   | 82.34            | 0.011                             | 99.90* | rest             | 0.04                                | 0.001** | rest             |
| E5         | 0.249                    | 49.88  | 49.87            | 0.03                          | 99.96* | rest             | 0.44                               | 0.006** | rest             | 0.10                      | 17.62   | 82.28            | 0.03                              | 99.92* | rest             | 0.11                                | 0.001** | rest             |
| E6         | 0.506                    | 49.76  | 49.74            | 0.07                          | 99.92* | rest             | 0.90                               | 0.006** | rest             | 0.20                      | 17.60   | 82.20            | 0.08                              | 99.87* | rest             | 0.22                                | 0.001** | rest             |
| E7         | 1.00                     | 49.50  | 49.50            | 0.14                          | 99.85* | rest             | 1.78                               | 0.007** | rest             | 0.40                      | 17.56   | 82.04            | 0.16                              | 99.79* | rest             | 0.44                                | 0.002** | rest             |
| E8         | 2.00                     | 48.98  | 49.02            | 0.32                          | 99.63* | rest             | 3.52                               | 0.009** | rest             | 0.81                      | 17.48   | 81.71            | 0.36                              | 99.40* | rest             | 0.88                                | 0.002** | rest             |
| E9         | 4.00                     | 48.00  | 48.00            | 0.90                          | 99.00* | rest             | 6.77                               | 0.015** | rest             | 1.64                      | 17.34   | 81.02            | 1.02                              | 98.52  | rest             | 1.73                                | 0.003** | rest             |
| E10        | 7.25                     | 36.28  | 56.47            | 2.47                          | 97.33* | rest             | 10.14                              | 0.026** | rest             | 2.67                      | 11.77   | 85.56            | 2.77                              | 96.30  | rest             | 2.67                                | 0.006** | rest             |
| E11        | 11.52                    | 35.97  | 52.51            | 8.16                          | 91.54  | rest             | 13.89                              | 0.046** | rest             | 4.44                      | 12.22   | 83.34            | 9.07                              | 89.56  | rest             | 3.77                                | 0.011** | rest             |
| E12        | 11.01                    | 44.49  | 44.49            | 8.16                          | 91.54  | rest             | 13.56                              | 0.044** | rest             | 4.72                      | 16.80   | 78.48            | 9.07                              | 89.56  | rest             | 3.67                                | 0.010** | rest             |
| E13        | 20.91                    | 33.48  | 45.61            | 24.80                         | 74.20  | rest             | 17.64                              | 0.083** | rest             | 8.78                      | 12.39   | 78.83            | 26.31                             | 69.33  | rest             | 4.95                                | 0.021** | rest             |
| E14        | 28.89                    | 31.38  | 39.73            | 38.26                         | 58.44  | rest             | 19.41                              | 0.109** | rest             | 13.13                     | 12.56   | 74.30            | 37.04                             | 49.82  | rest             | 5.54                                | 0.027** | rest             |
| E15        | 36.20                    | 28.62  | 35.18            | 47.84                         | 45.16  | rest             | 20.18                              | 0.123** | rest             | 17.56                     | 12.23   | 70.21            | 41.10                             | 34.17  | rest             | 5.80                                | 0.031** | rest             |
| E16        | 37.74                    | 31.13  | 31.13            | 47.83                         | 45.16  | rest             | 20.54                              | 0.130** | rest             | 19.53                     | 14.19   | 66.28            | 41.08                             | 34.16  | rest             | 5.92                                | 0.033** | rest             |
| E17        | 42.99                    | 28.52  | 28.49            | 52.98                         | 37.52  | rest             | 21.48                              | 0.140** | rest             | 23.20                     | 13.55   | 63.25            | 42.35                             | 26.41  | rest             | 6.24                                | 0.036** | rest             |
| E18        | 47.98                    | 25.99  | 26.03            | 56.72                         | 30.78  | rest             | 22.27                              | 0.149** | rest             | 26.96                     | 12.86   | 60.18            | 41.93                             | 20.04  | rest             | 6.52                                | 0.038** | rest             |
| E19        | 41.30                    | 10.64  | 48.06            | 60.55                         | 20.59  | rest             | 23.53                              | 0.15    | rest             | 16.63                     | 3.77    | 79.60            | 38.74                             | 11.60  | rest             | 6.97                                | 0.04    | rest             |
| E20        | 42.20                    | 7.09   | 50.71            | 60.65                         | 13.40  | rest             | 26.06                              | 0.31    | rest             | 16.41                     | 2.43    | 81.16            | 33.84                             | 6.58   | rest             | 7.91                                | 0.08    | rest             |
| E21        | 42.67                    | 5.24   | 52.09            | 58.81                         | 9.69   | rest             | 29.71                              | 0.66    | rest             | 16.31                     | 1.76    | 81.92            | 29.86                             | 4.33   | rest             | 9.38                                | 0.18    | rest             |
| E22        | 42.93                    | 4.25   | 52.82            | 53.84                         | 6.54   | rest             | 34.42                              | 1.41    | rest             | 16.26                     | 1.42    | 82.32            | 24.19                             | 2.59   | rest             | 11.49                               | 0.41    | rest             |

TBA – *tert*-butyl alcohol, CHX – cyclohexane, H<sub>2</sub>O – water;

\* – result of approximation based on our experimental data of separation boundary;

\*\* – result of calculation of CHX concentration in terms of its solubility in water<sup>1</sup>

The standard uncertainties are  $u(\omega_{\text{TBA}}) \leq 0.0025$  % mass for the samples E1-E5, for other components and samples  $u(\omega) \leq 0.004$  % mass; phase composition  $\leq 5$  percent of TBA and CHX concentration values

**Table S2 – Experimental values of refractive index  $n_D$ , density  $\rho$ , surface tension  $\gamma_{l-g}$  and interfacial tension  $\gamma_{l-l}$  of equilibrated phases in triple system of «water – TBA – CHX» at 20 °C**

| Sample | Oil phase |               |                       | Water phase |               |                       | Interfacial tension $\gamma_{l-l}$ , mN/m |
|--------|-----------|---------------|-----------------------|-------------|---------------|-----------------------|-------------------------------------------|
|        | $n_D$     | $\rho$ , g/ml | $\gamma_{l-g}$ , mN/m | $n_D$       | $\rho$ , g/ml | $\gamma_{l-g}$ , mN/m |                                           |
| E0     | 1.4265    | 0.776         | 24.9                  | 1.3332      | 0.998         | 72.6                  | 48.8*<br>48.30±0.19**                     |
| E1     | 1.4266    | 0.779         | 25.1                  | 1.3330      | 0.998         | 72.3                  | 48.3*                                     |
| E2     | 1.4265    | 0.778         | 25.1                  | 1.3330      | 0.998         | 72.1                  | 48.2*                                     |
| E3     | 1.4264    | 0.778         | 25.1                  | 1.3331      | 0.999         | 70.5                  | 47.0*                                     |
| E4     | 1.4264    | 0.778         | 25.1                  | 1.3332      | 0.997         | 68.0                  | 45.0*                                     |
| E5     | 1.4266    | 0.778         | 25.1                  | 1.3335      | 0.998         | 63.6                  | 41.0*                                     |
| E6     | 1.4266    | 0.777         | 25.1                  | 1.3342      | 0.996         | 58.1                  | 36.5*                                     |
| E7     | 1.4265    | 0.776         | 24.8                  | 1.3350      | 0.995         | 52.3                  | 30.0*                                     |
| E8     | 1.4265    | 0.776         | 24.8                  | 1.3365      | 0.992         | 45.8                  | 24.5*                                     |
| E9     | 1.4263    | 0.775         | 24.8                  | 1.3398      | 0.987         | 38.8                  | 17.1*                                     |
| E10    | 1.4230    | 0.776         | 24.8                  | 1.3425      | 0.984         | 35.6                  | 12.4*                                     |
| E11    | 1.4200    | 0.776         | 24.3                  | 1.3470      | 0.976         | 31.4                  | 7.3*                                      |
| E12    | 1.4224    | 0.776         | 24.2                  | 1.3471      | 0.979         | 30.5                  | 7.2*                                      |
| E13    | 1.4110    | 0.778         | 23.1                  | 1.3505      | 0.974         | 28.2                  | 3.5*<br>3.26±0.14**                       |
| E14    | 1.4045    | 0.783         | 22.6                  | 1.3520      | 0.971         | 26.4                  | 2.3*                                      |
| E15    | 1.3995    | 0.790         | 22.4                  | 1.3530      | 0.969         | 26.3                  | 1.7*                                      |
| E16    | 1.4010    | 0.791         | 22.5                  | 1.3542      | 0.969         | 26.1                  | 1.7*                                      |
| E17    | 1.3978    | 0.796         | 22.3                  | 1.3551      | 0.967         | 25.9                  | 1.3*                                      |
| E18    | 1.3944    | 0.802         | 22.2                  | 1.3556      | 0.966         | 25.5                  | 1.0*<br>0.977±0.041**                     |
| E19    | 1.3899    | 0.820         | 22.0                  | 1.3580      | 0.962         | 24.8                  | 0.4*<br>0.515±0.020**                     |
| E20    | 1.3858    | 0.835         | 22.1                  | 1.3589      | 0.953         | 24.1                  | 0.1*<br>0.228±0.013**                     |
| E21    | 1.3823    | 0.853         | -                     | 1.3611      | 0.946         | -                     | 0.0457±0.0015**                           |
| E22    | 1.3790    | 0.868         | -                     | 1.3635      | 0.934         | -                     | 0.0025±0.0017**                           |

\* - Wilhelmy plate method

\*\* - Spinning drop method

The standard uncertainties are  $u(n_D) = 0.0005$ ,  $u(\rho) = 0.003$  g/mL,  $u(\gamma_{l-g}) = 0.3$  mN/m (for Wilhelmy plate),  $u(\gamma_{l-l}) = 0.3$  mN/m (for Wilhelmy plate)

**Table S3 – Experimental results of determination of separation boundary in the system of water – TBA – CHX by gravimetric titration at 20 °C**

| Composition in two-phase region, wt% |       |       | Composition in one-phase region wt% |       |       |
|--------------------------------------|-------|-------|-------------------------------------|-------|-------|
| H <sub>2</sub> O                     | TBA   | CHX   | H <sub>2</sub> O                    | TBA   | CHX   |
| 60.81                                | 36.59 | 2.60  | 60.78                               | 36.63 | 2.59  |
| 37.08                                | 55.05 | 7.87  | 37.01                               | 55.14 | 7.85  |
| 65.73                                | 32.66 | 1.61  | 65.51                               | 32.89 | 1.61  |
| 40.89                                | 52.36 | 6.75  | 40.75                               | 52.52 | 6.72  |
| 32.65                                | 57.22 | 10.13 | 32.51                               | 57.40 | 10.09 |
| 26.53                                | 59.70 | 13.77 | 26.43                               | 59.86 | 13.71 |
| 19.37                                | 60.19 | 20.44 | 19.30                               | 60.33 | 20.37 |
| 10.16                                | 54.49 | 35.35 | 10.12                               | 54.69 | 35.19 |
| 56.90                                | 40.04 | 3.06  | 56.50                               | 40.45 | 3.04  |
| 48.96                                | 46.49 | 4.55  | 48.83                               | 46.64 | 4.53  |
| 43.04                                | 51.39 | 5.57  | 42.82                               | 51.64 | 5.54  |
| 12.95                                | 57.06 | 30.00 | 12.86                               | 57.34 | 29.80 |
| 7.96                                 | 50.38 | 41.66 | 7.92                                | 50.60 | 41.48 |
| 6.06                                 | 46.05 | 47.89 | 6.04                                | 46.25 | 47.71 |
| 57.02                                | 39.98 | 3.00  | 56.81                               | 40.20 | 2.99  |
| 16.86                                | 60.57 | 22.57 | 16.80                               | 60.71 | 22.49 |
| 46.53                                | 48.39 | 5.07  | 46.33                               | 48.62 | 5.05  |
| 22.11                                | 61.30 | 16.60 | 22.03                               | 61.43 | 16.54 |
| 4.81                                 | 43.53 | 51.66 | 4.79                                | 43.74 | 51.47 |
| 3.05                                 | 36.31 | 60.64 | 3.04                                | 36.47 | 60.49 |
| 3.91                                 | 40.77 | 55.32 | 3.89                                | 40.99 | 55.12 |
| 1.93                                 | 30.81 | 67.26 | 1.93                                | 31.08 | 67.00 |
| 1.18                                 | 24.39 | 74.42 | 1.18                                | 24.58 | 74.25 |
| 0.43                                 | 14.52 | 85.05 | 0.43                                | 14.77 | 84.81 |
| 75.08                                | 24.57 | 0.35  | 74.98                               | 24.67 | 0.35  |
| 69.96                                | 29.22 | 0.82  | 69.82                               | 29.36 | 0.82  |
| 52.19                                | 44.09 | 3.73  | 52.03                               | 44.25 | 3.72  |
| 14.72                                | 59.73 | 25.55 | 14.69                               | 59.80 | 25.51 |
| 2.46                                 | 33.75 | 63.79 | 2.46                                | 33.91 | 63.63 |
| 1.57                                 | 27.25 | 71.17 | 1.57                                | 27.38 | 71.05 |
| 0.82                                 | 19.43 | 79.75 | 0.82                                | 19.62 | 79.56 |
| 28.39                                | 60.05 | 11.57 | 28.31                               | 60.15 | 11.54 |
| 43.41                                | 50.88 | 5.72  | 43.22                               | 51.09 | 5.69  |

Separation boundary is between the corresponding two-phase and one-phase compositions

**Table S4 – Compositions, interfacial tension, and correlation length for the samples studied by DLS method**

| Sample            | Wt% (H <sub>2</sub> O;TBA;CHX) | $\gamma$ (mN/m) | $\xi$ (nm) |
|-------------------|--------------------------------|-----------------|------------|
| DLS <sub>11</sub> | 48.07; 41.32; 10.62            | 0.515           | 1          |
| DLS <sub>12</sub> | 50.64; 41.94; 7.42             | 0.228           | 2          |
| DLS <sub>13</sub> | 52.17; 42.63; 5.20             | 0.0457          | 3          |
| DLS <sub>14</sub> | 52.92; 42.84; 4.24             | 0.0025          | 6          |
| DLS <sub>21</sub> | 27.4; 47.2; 25.4               | (1)             | 1          |
| DLS <sub>22</sub> | 48.5; 41.3; 10.2               | (0.515)         | 1.5        |
| DLS <sub>23</sub> | 51.9; 41.0; 7.1                | (0.228)         | 2          |
| DLS <sub>24</sub> | 53.5; 42.2; 43.3               | (0.0457)        | 4          |
| DLS <sub>25</sub> | 54.3; 42.0; 3.7                | (0.0025)        | 9.5        |

Data shown in parentheses are interpolations because these DLS samples were not of the exactly same concentrations as the samples for  $\gamma$  measurements

**Table S5 - Composition of each system studied with MD**

| System | TBA in water |       | # molecules in simulation |     |     | overall wt% compositions |       |       | total # atoms |
|--------|--------------|-------|---------------------------|-----|-----|--------------------------|-------|-------|---------------|
|        | mol%         | mass% | H <sub>2</sub> O          | CHX | TBA | H <sub>2</sub> O         | CHX   | TBA   |               |
| S0     | 0.00         | 0.00  | 1600                      | 250 | 0   | 57.81                    | 42.19 | 0.00  | 10900         |
| S1     | 0.01         | 0.05  | 1650                      | 220 | 8   | 60.87                    | 37.92 | 1.21  | 10680         |
| S2     | 0.11         | 0.46  | 1650                      | 220 | 26  | 59.25                    | 36.91 | 3.84  | 10950         |
| S3     | 0.18         | 0.73  | 1650                      | 220 | 34  | 58.56                    | 36.48 | 4.96  | 11070         |
| S4     | 0.44         | 1.80  | 1650                      | 220 | 44  | 57.72                    | 35.95 | 6.33  | 11220         |
| S5     | 0.67         | 2.68  | 1600                      | 220 | 50  | 56.47                    | 36.27 | 7.26  | 11110         |
| S6     | 1.89         | 7.34  | 1500                      | 220 | 64  | 53.74                    | 36.82 | 9.43  | 10920         |
| S7     | 2.64         | 10.04 | 1500                      | 220 | 80  | 52.50                    | 35.97 | 11.52 | 11160         |
| S8     | 3.48         | 12.92 | 1500                      | 220 | 96  | 51.32                    | 35.16 | 13.51 | 11400         |
| S9     | 4.47         | 16.14 | 1500                      | 220 | 114 | 50.05                    | 34.30 | 15.65 | 11670         |
| S10    | 5.54         | 19.44 | 1500                      | 220 | 132 | 48.85                    | 33.47 | 17.69 | 11940         |
| S11    | 7.23         | 24.29 | 1400                      | 220 | 156 | 45.61                    | 33.48 | 20.91 | 11900         |
| S12    | 12.09        | 36.13 | 1300                      | 220 | 230 | 39.71                    | 31.39 | 28.90 | 12610         |
| S13    | 18.59        | 48.44 | 1260                      | 220 | 316 | 35.12                    | 28.65 | 36.24 | 13740         |
| S14    | 24.05        | 56.59 | 1200                      | 220 | 410 | 30.65                    | 26.25 | 43.09 | 14910         |
| S15    | 29.79        | 63.59 | 1100                      | 220 | 484 | 26.71                    | 24.95 | 48.34 | 15620         |
| S16    | 34.24        | 68.20 | 1000                      | 220 | 550 | 23.31                    | 23.95 | 52.74 | 16210         |
| S17    | 38.91        | 72.40 | 1000                      | 220 | 650 | 21.27                    | 21.86 | 56.88 | 17710         |
| S18    | 44.61        | 76.83 | 900                       | 220 | 750 | 17.95                    | 20.50 | 61.55 | 18810         |

**Table S6 - Simulated values of interfacial tension in ternary system of water – TBA – CHX at 25 °C**

| System | TBA in water mol% | TBA in water wt% | Interfacial tension $\gamma_{1-2}$ (mN/m) |   |      |
|--------|-------------------|------------------|-------------------------------------------|---|------|
| S0     | 0.00              | 0.00             | 48.92                                     | ± | 0.03 |
| S1     | 0.01              | 0.07             | 47.37                                     | ± | 0.48 |
| S2     | 0.11              | 0.38             | 40.48                                     | ± | 0.48 |
| S3     | 0.18              | 0.70             | 35.67                                     | ± | 0.46 |
| S4     | 0.44              | 2.48             | 28.71                                     | ± | 0.52 |
| S5     | 0.67              | 2.47             | 26.39                                     | ± | 0.49 |
| S6     | 1.89              | 8.40             | 21.54                                     | ± | 0.58 |
| S7     | 2.64              | 8.58             | 15.31                                     | ± | 0.56 |
| S8     | 3.48              | 11.67            | 13.13                                     | ± | 0.66 |
| S9     | 4.47              | 15.42            | 10.46                                     | ± | 0.63 |
| S10    | 5.54              | 18.38            | 9.37                                      | ± | 0.63 |
| S11    | 7.23              | 23.27            | 7.41                                      | ± | 0.63 |
| S12    | 12.09             | 36.49            | 4.58                                      | ± | 0.76 |
| S13    | 18.59             | 48.23            | 2.52                                      | ± | 0.78 |
| S14    | 24.05             | 56.59            | 1.56                                      | ± | 0.38 |
| S15    | 29.79             | 63.62            | -0.71                                     | ± | 1.36 |
| S16    | 34.24             | 68.20            | 1.44                                      | ± | 0.67 |
| S17    | 38.91             | 72.40            | -1.77                                     | ± | 0.47 |
| S18    | 44.61             | 76.83            | 0.12                                      | ± | 1.19 |

**Table S7 – Theoretical values related to the thickness of the interface (Eq. 4), the interfacial tension is included as a reference**

| System | $\gamma$ (mN/m) |   |       | Thickness, $2\zeta$ (nm) |   |       | $\Delta\rho_o$ (molec/nm <sup>3</sup> ) |   |       |
|--------|-----------------|---|-------|--------------------------|---|-------|-----------------------------------------|---|-------|
| S1     | 47.374          | ± | 0.485 | 0.324                    | ± | 0.000 | 27.100                                  | ± | 0.004 |
| S2     | 40.480          | ± | 0.484 | 0.359                    | ± | 0.001 | 27.018                                  | ± | 0.004 |
| S3     | 35.668          | ± | 0.462 | 0.387                    | ± | 0.000 | 26.966                                  | ± | 0.004 |
| S4     | 28.711          | ± | 0.519 | 0.422                    | ± | 0.002 | 26.688                                  | ± | 0.015 |
| S5     | 26.387          | ± | 0.492 | 0.449                    | ± | 0.004 | 26.509                                  | ± | 0.011 |
| S6     | 21.540          | ± | 0.579 | 0.606                    | ± | 0.005 | 25.886                                  | ± | 0.024 |
| S7     | 15.313          | ± | 0.559 | 0.573                    | ± | 0.007 | 25.273                                  | ± | 0.020 |
| S8     | 13.132          | ± | 0.662 | 0.624                    | ± | 0.015 | 24.520                                  | ± | 0.032 |
| S9     | 10.459          | ± | 0.631 | 0.658                    | ± | 0.021 | 23.687                                  | ± | 0.012 |
| S10    | 9.373           | ± | 0.632 | 0.685                    | ± | 0.016 | 22.761                                  | ± | 0.047 |



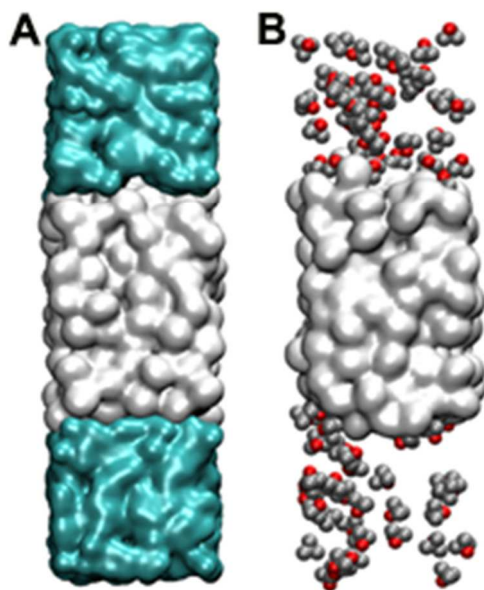

Figure S1. Initial simulation box setup, (A) bulk water is shown in cyan and bulk cyclohexane in white; (B) TBA in aqueous solution at the beginning of the simulation (explicit molecule; C atoms in gray, O atoms in red), *water not shown for clarity*

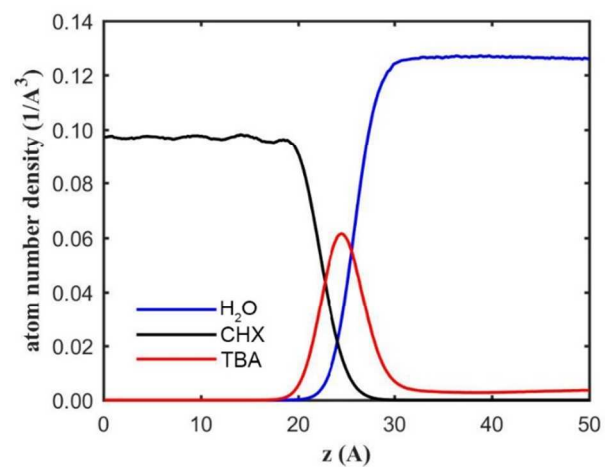

Figure S2. Sample atom density profile (ADP) for the S3 system

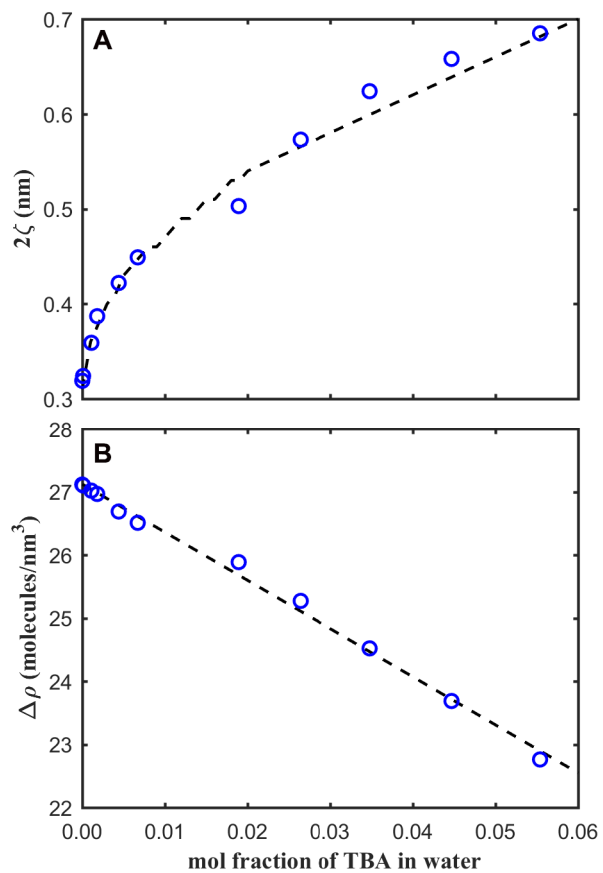

Figure S3. Thickness of the interface and difference in bulk densities as a function of TBA concentration (from MD simulations)

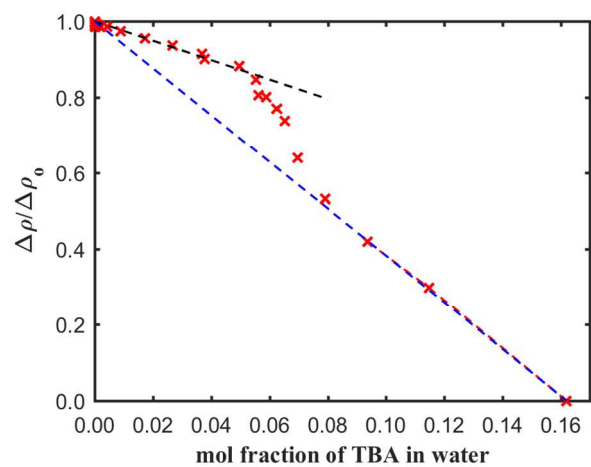

Figure S4. Experimental values of normalized density difference of coexisting phases as a function of TBA concentration

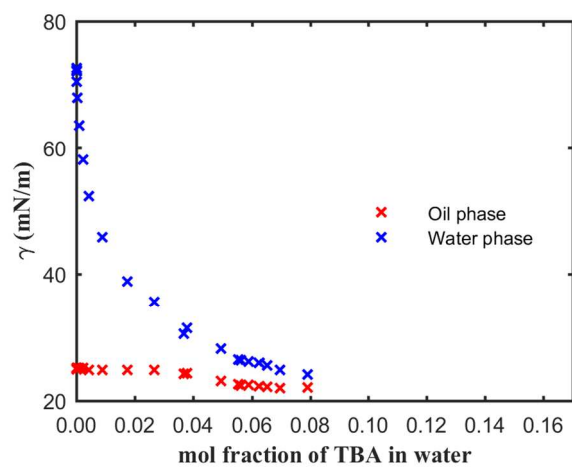

Figure S5. Surface tension between the water phase and the oil phase with air, respectively, as a function of TBA concentration.

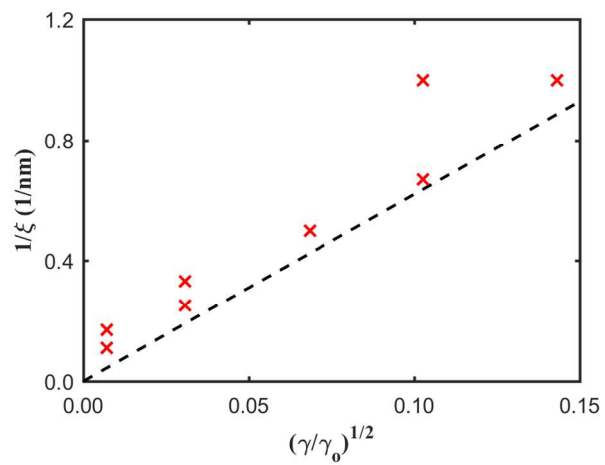

Figure S6. Linear relation between the inverse of the interface thickness ( $2\xi$ ) and the square root of the reduced interfacial tension. The dashed line is the scaling prediction for the relation between these two properties.

## Section 2. Comparison of adsorption isotherms

Von Szyszkowski more than 100 years ago suggested an empirical equation for the adsorption isotherm:

$$\frac{\gamma}{\gamma_0} = 1 - A \log(1 + Bc) \quad (S1)$$

where  $A$  and  $B$  are constants, and  $c$  is the molar concentration. According to Ross and Morrison,<sup>3</sup> surface pressure can be expressed as:

$$\gamma_0 - \gamma = RT\Gamma_m \ln \left( \frac{f_2^\alpha x_2^\alpha}{a_2 f_2^s} + \frac{f_1^\alpha (1 - x_2^\alpha)}{a_1 f_1^s} \right) \quad (S2)$$

where  $\Gamma_m$  – maximum adsorption,  $f_1$  and  $f_2$  – activity coefficients,  $a_1$  and  $a_2$  – constants, superscripts  $\alpha$  and  $s$  denote the bulk and surface phases, respectively, and subscripts 1 and 2 denote the solvent and solute, respectively. Equation (S2) could be simplified when the following approximations are valid:

$$\frac{f_1^\alpha}{f_1^s} \approx 1; \quad \frac{f_2^\alpha}{f_2^s} \approx \text{const}; \quad a_1 = \frac{f_1^{0\alpha}}{f_1^{0s}} \approx 1,$$

where the additional superscript 0 denotes the pure solvent. After simplifications, equation (S2) becomes:

$$\frac{\gamma}{\gamma_0} = 1 - A \ln(Bx_2^\alpha + 1) \quad (S3)$$

where  $A$  and  $B$  are constants. Note: equation (S3) is essentially the same as equation (S1).

Our experimental results can be described by equation (S3) up to the molar fraction of TBA of about 0.07 (see Fig. S7 below). At higher concentration the interfacial tension approximated by equation (S3) becomes negative, which is obviously unphysical. The fitting constants for equation (S3) are  $A = 0.2382$ ;  $B = 838.2$ .

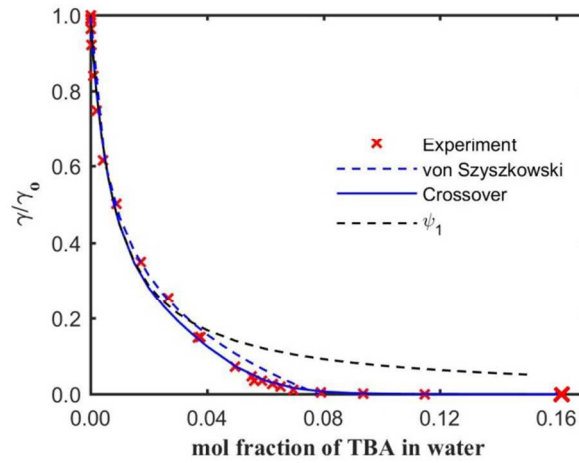

Figure S7. Approximation of experimental results by von Szyszkowski isotherm (Eq. S3) and crossover Eq. (7). The critical point at [0.1622; 0.0] is indicated by a bigger cross marker.

According to the Gibbs theory, we can describe the behavior of solute as adsorption, if we assume that the activity is not much different from the concentration ( $f \approx 1$ ), and the model parameters can be chosen such that the mole fraction ( $x$ ) replaces the molar concentration ( $c$ ).

$$\Gamma = - \frac{fc}{RT} \frac{d\gamma}{d(fc)} \quad (S4)$$

Thus, the von Szyszkowski equation in the form of (S5) can be transformed into equation (S6) which is equivalent to the Langmuir adsorption model:

$$\frac{\gamma}{\gamma_0} = 1 - a_1 \ln(1 + a_2 x) \quad (\text{S5})$$

$$\Gamma = -\frac{x d\gamma}{RT dx} = -\frac{a_1 \gamma_0}{RT} \left( \frac{a_2 x}{1 + a_2 x} \right) \quad (\text{S6})$$

As pointed out by Ross and Morrison,<sup>3</sup> the observed adsorption isotherm of Langmuir-von Szyszkowski type does not imply the ideal behavior of solute in bulk or interface, but merely indicates that the deviations from ideality in bulk and interface are close to each other. Nevertheless, this adsorption model implies that the adsorption asymptotically approaches to a constant value ( $\Gamma_m$ ), and cannot include the decrease of adsorption corresponding to the vanishing of interfacial tension at the critical point.

In some simulations, we observed the tendency of TBA molecules to temporarily form the associates at the interface between the water and oil phases. This suggests that adsorption model should take into account the interactions of adsorbate molecules at the interface. The Frumkin adsorption model (that phenomenologically accounts this effect) reads<sup>4</sup>:

$$\Gamma = -\frac{d\gamma}{RT d(\ln x)} = -\frac{x d\gamma}{RT dx} = -\frac{a_1 \gamma_0}{RT} \left( \frac{a_2 x}{1 + a_2 x} \right) e^{-a_3 x} \quad (\text{S7})$$

We compared the adsorption (obtained by taking the derivative of the interfacial tension with respect to  $\ln x$  after initial smoothing the data by a spline-fit function<sup>5</sup>) with the crossover model, and the adsorption models of Langmuir-von Szyszkowski (fitted parameters are  $a_1=0.2382$ ;  $a_2=838.2$ ) and Frumkin (fitted parameters are  $a_1=36.66$ ;  $a_2=81.01$ ;  $a_3=24.26$ ). The results are shown in Figure S8. Note that only the crossover function approaches zero at the critical point in agreement with the experiment.

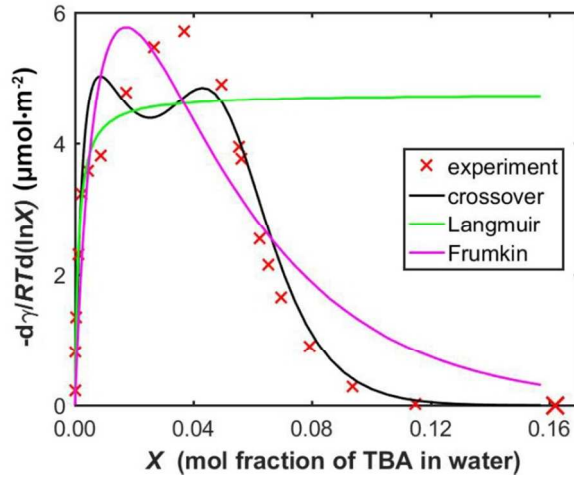

Figure S8. Approximation of experimental adsorption data by crossover isotherm, Langmuir–von Szyszkowski isotherm (Eq. S6) and Frumkin isotherm (Eq. S7). The critical point at [0.1622; 0.00] is indicated by a bigger cross marker.



### Section 3. Simulation model limitations and justification

Our simulation model does not accurately represent the solvation interactions between TBA (solute) in the bulk cyclohexane (CHX) solvent. At low hydrotrope concentrations, one could argue TBA will be present in smaller fractions at the interface than those represented in our model because it partitions to both phases. However, there is good agreement between simulation and experiment below 0.7 mol% of TBA in water, and even up to concentrations below 6 mol% with minor adjustments using Eq. 5 in the main manuscript (system S10). Which indicates the interactions between TBA and CHX are not critical at these low concentrations because the hydrotrope would rather interact with water or remain at the interface between the two liquids. Moreover, the amount of TBA at the interface does not depend on its solubility in CHX at higher concentrations, i.e. when the interface is saturated. The plot below shows the interface starts to saturate in TBA with system S5 (0.7 mol% TBA in water at equilibrium) and does not change much after this point (black data points). Therefore, our representation of the interfacial profiles is still representative of the real systems (up to system S10).

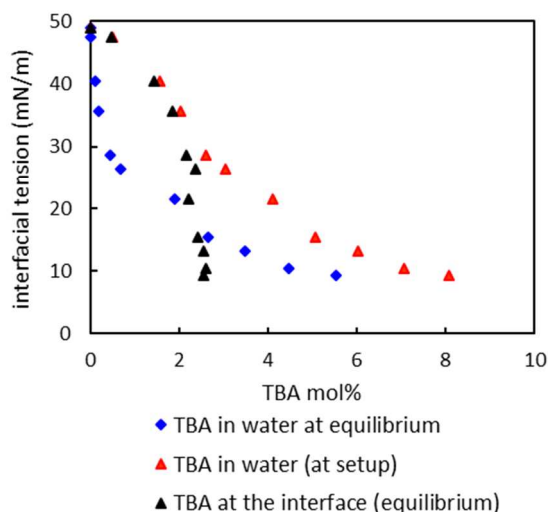

Figure S9. Concentration of TBA at the beginning of the simulation (red), at equilibrium in the aqueous phase (blue) and at the interface (black) for the simulation systems S1 to S10 shown with their corresponding interfacial tension.

As far as the simulation force field (FF) itself, CHARMM36 General FF<sup>6</sup> was optimized to reproduce the interactions between alcohols and water. However, the accuracy of interactions between alcohols and an organic solvent may suffer due to the response of partial charges on atoms upon a change of environment in the organic phase. The current model contains a too high of a charge penalty when bringing TBA into the organic phase. This would be consistent with all pairwise additive models. Alternate FFs, such as TraPPE-UA FF<sup>7</sup> or HH-Alkane<sup>8</sup> are united atom FF optimized to reproduce the properties of pure alcohols and to represent better the interactions between water and alkanes, respectively. The TraPPE-UA FF did not perform well for binary mixtures of alcohols and water in terms of predicting the correct pressure of the system, which also suggests that the interfacial tension between liquids may not reproduce experimental results. On the other hand, the HH-Alkane FF, developed as a refined form of the TraPPE-UA, still does not accurately reproduce experimental values of the alkanes' solubility in water and was not tested for alcohols.

With all this in mind, the main issue with the TraPPE-UA FF is that it is not optimized with respect to water. The alkane-TBA interaction might be improved compared to our model but we cannot use this FF for explicit hydrogen water. In addition, we did not want to mix UA and AA FFs as this can be dangerous as inconsistency in optimization procedures between FFs. The charges used on the alcohols for UA FF will not match well with how this was obtained with the AA FF. In summary, we believe we are getting the correct interfacial behavior at low TBA concentration, but are missing the difficult-to-predict partitioning in the organic phase.

## REFERENCES

1. Kudchadker, A. P.; McKetta, J. J., Solubility of cyclohexane in water. *AIChE Journal* **1961**, 7 (4), 707-707.
2. Von Szyszkowski, B., Experimental studies on capillary properties of aqueous solutions of fatty acids. *Zeitschrift für physikalische Chemie* **1908**, 64 (1), 385.
3. Ross, S.; Morrison, I. D., On the alleged ideality of szyszkowski-langmuir adsorption. *J. Colloid Interf. Sci* **1983**, 91 (1), 244-247.
4. Frumkin, A. N., The Capillary Curve of the Higher Fatty Acids and the State Equation of the Surface Layer. *Zeitschrift für Phys. Chemie* **1925**, 116U.
5. Eaton, J. W.; Bateman, D.; Hauberg, S.; Wehbring, R., GNU Octave version 4.0.0 manual: A High-level Interactive Language for Numerical Computations. <http://www.gnu.org/software/octave/doc/interpreter/> **2015**.
6. Vanommeslaeghe, K.; Hatcher, E.; Acharya, C.; Kundu, S.; Zhong, S.; Shim, J.; Darian, E.; Guvench, O.; Lopes, P.; Vorobyov, I.; MacKerell, A. D., CHARMM General Force Field: A Force Field for Drug-Like Molecules Compatible with the CHARMM All-Atom Additive Biological Force Fields. *J. Comput. Chem.* **2010**, 31 (4), 671-690.
7. Chen, B.; Potoff, J. J.; Siepmann, J. I., Monte Carlo Calculations for Alcohols and Their Mixtures with Alkanes. Transferable Potentials for Phase Equilibria. 5. United-Atom Description of Primary, Secondary, and Tertiary Alcohols. *J. Phys. Chem. B* **2001**, 105 (15), 3093-3104.
8. Ashbaugh, H. S.; Liu, L.; Surampudi, L. N., Optimization of linear and branched alkane interactions with water to simulate hydrophobic hydration. *J. Chem. Phys.* **2011**, 135 (5), 054510.
